# Supplementary material
Source: PubMed Central journal article supplement (PMC4720437)
Supplement: NIHMS739694-supplement-1.pdf [file NIHMS739694-supplement-1.pdf]

**Fig S1**

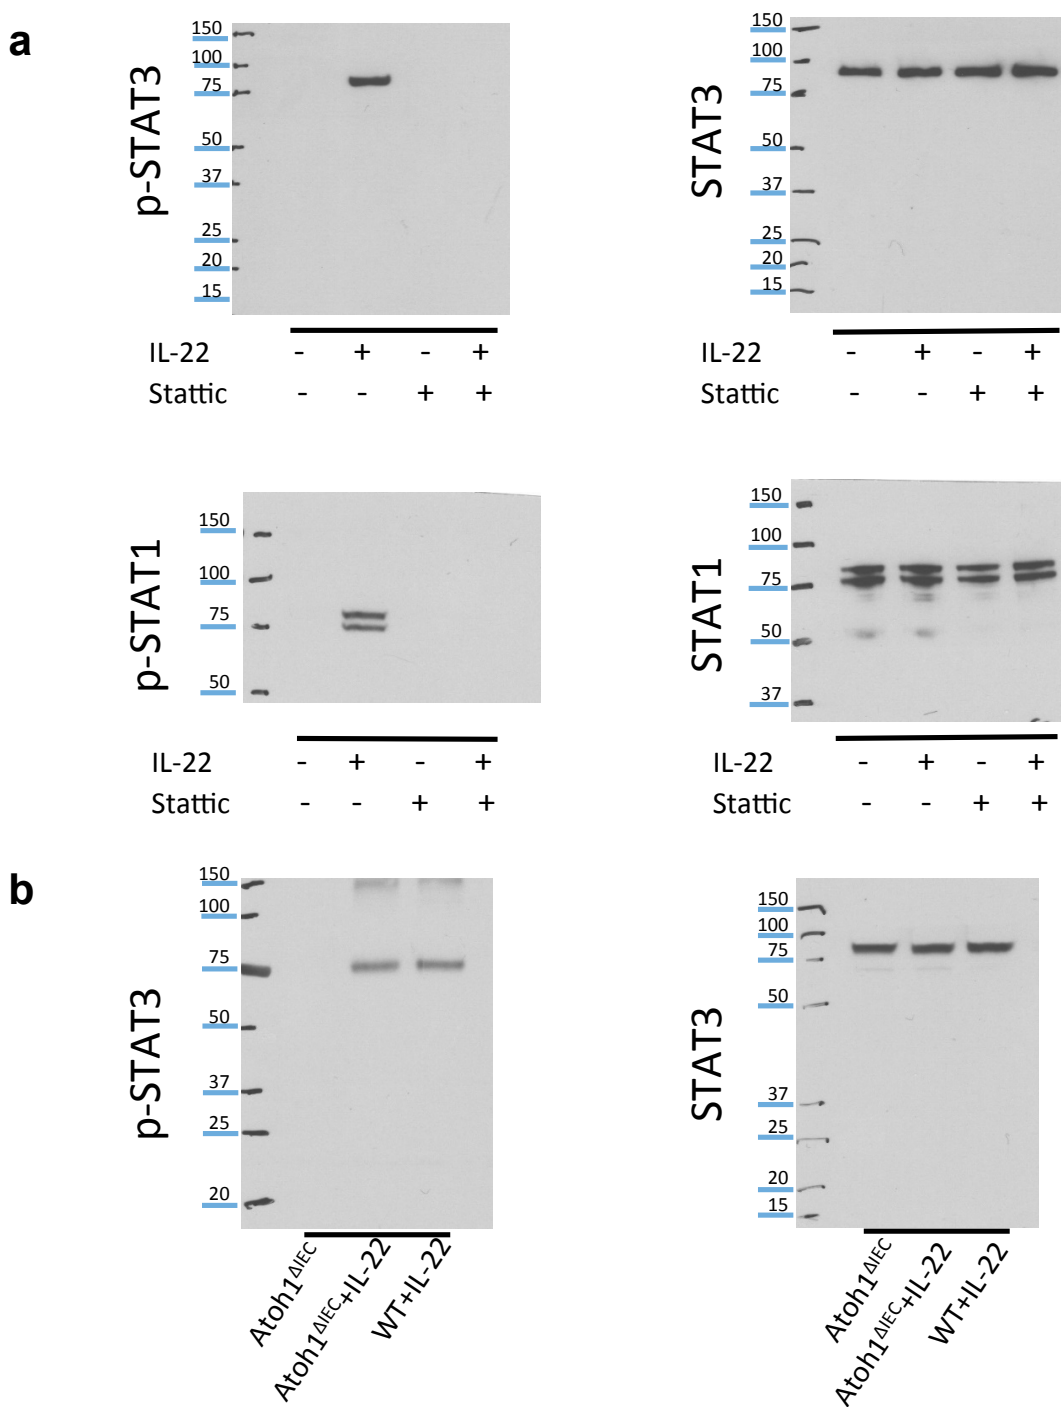

**Supplementary Figure 1. a**, Original blots from Figure 2b. **b**, Original blots from Figure 4e. Images were cropped for the main figures to show the areas containing the indicated STAT proteins.
